# Supplementary material for: Innate Immunity Activation and RNAi Interplay in Citrus Exocortis Viroid—Tomato Pathosystem
Source: MDPI journal article supplement (doi:10.3390/v10110587), 2018-10-26

**Figure S3 Mappings of PARE reads on CEVd genome for positive and negative strands and for both biological replicates**

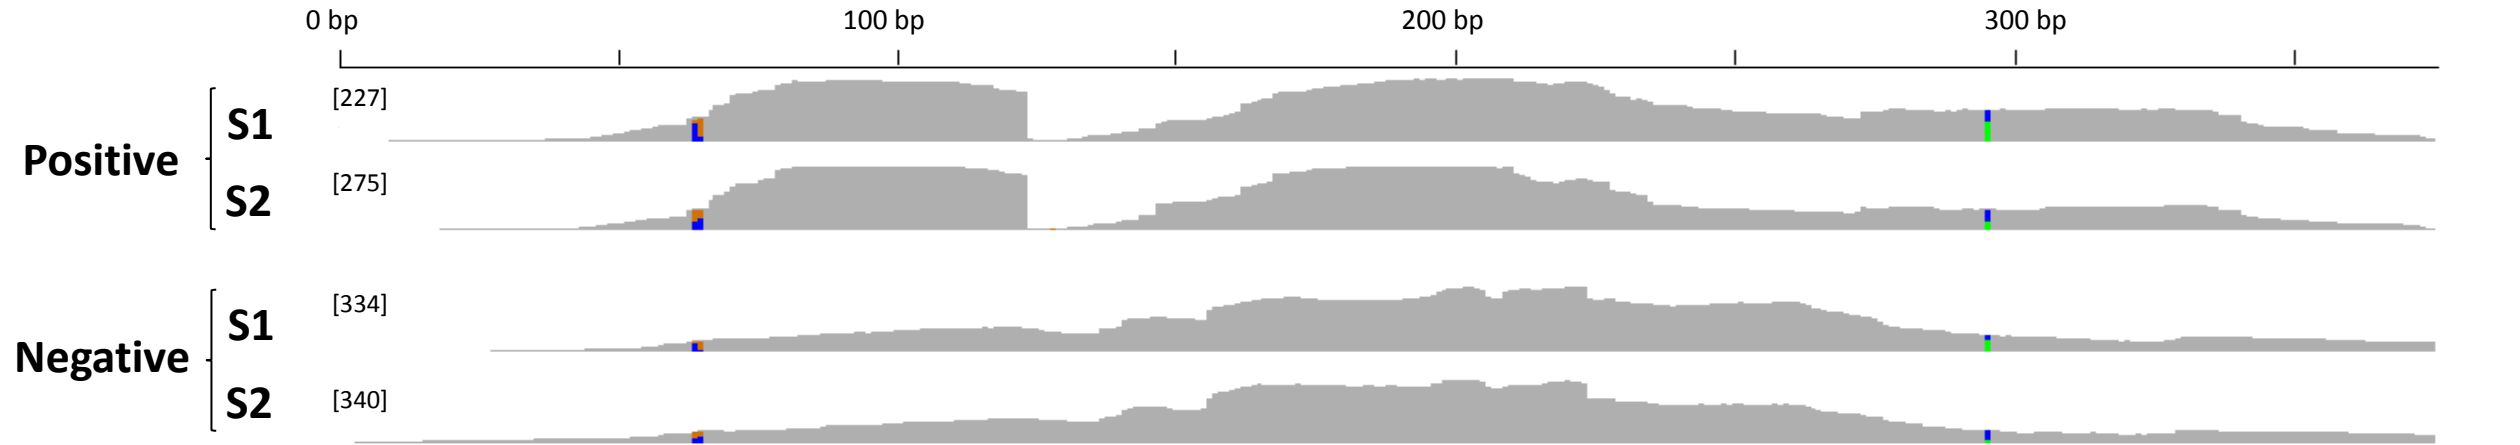

Supplement: s1 [file s1]
